# Supplementary material for: Accuracy of Matrix-Assisted Laser Desorption Ionization–Time of Flight Mass Spectrometry for Identification of Mycobacteria: a systematic review and meta-analysis
Source: PubMed Central journal article supplement (PMC5841357; doi:10.1038/s41598-018-22642-w), 2018-03-07
Supplement: 41598_2018_22642_MOESM1_ESM.pdf [file 41598_2018_22642_MOESM1_ESM.pdf]

## Supplementary information

### **Accuracy of Matrix-Assisted Laser Desorption Ionization–Time of Flight Mass Spectrometry for Identification of Mycobacteria: a systematic review and meta-analysis**

Yan Cao <sup>1\*</sup>, Lei Wang<sup>2\*</sup>, Ping Ma<sup>3, 4</sup>, Fan Wenting<sup>4</sup>, Bing Gu<sup>#3, 4</sup>, Shaoqing Ju<sup>#1</sup>

1. Center of Laboratory Medicine, Affiliated Hospital of Nantong University, Nantong 226000, China.
2. Department of Histology and Embryology, Xuzhou Medical University, Xuzhou 221004, China.
3. Department of Laboratory Medicine, Affiliated Hospital of Xuzhou Medical University, Xuzhou 221002, China.
4. Medical Technology School, Xuzhou Medical University, Xuzhou 221004, China.

\*: The first two authors contributed equally to this work.

#Corresponding author:

Bing Gu, Department of Laboratory Medicine, Affiliated Hospital of Xuzhou Medical University, Xuzhou 221002, China. E-mail: gb20031129@163.com, Phone: +86-0516-83262509.

Shaoqing Ju, Department of Laboratory Medicine, Affiliated Hospital of Nantong University, Nantong 226000, China. E-mail: jsq814@hotmail.com, Tel/Fax:+86-0513-85052610

**Table S1. Characteristics of the 19 reports in this meta-analysis**

| <b>Study</b>       | <b>Study design</b> | <b>System</b>        | <b>Self-established database</b> | <b>Reference strains</b> | <b>QUADAS quality</b> |
|--------------------|---------------------|----------------------|----------------------------------|--------------------------|-----------------------|
| Lotz,2010          | retrospective       | Biotyper             | Yes                              | Yes                      | 11                    |
| Khechine,2011      | prospective         | Biotyper             | Yes                              | No                       | 12                    |
| Saleeb,2011        | retrospective       | Biotyper             | Yes                              | No                       | 11                    |
| Panda,2013         | retrospective       | Biotyper             | No                               | Yes                      | 12                    |
| Sung-Pin,2013      | retrospective       | Biotyper             | No                               | No                       | 11                    |
| Balada-Llasat,2013 | retrospective       | Biotyper             | No                               | Yes                      | 11                    |
| Jonathan,2013      | retrospective       | Biotyper/Vitek<br>MS | No                               | No                       | 12                    |
| Cheryl,2014        | retrospective       | Biotyper/Vitek<br>MS | Yes                              | No                       | 10.5                  |
| Marie-Sarah,2014   | retrospective       | Biotyper             | Yes                              | Yes                      | 11.5                  |
| Blake,2014         | retrospective       | Biotyper             | No                               | No                       | 11                    |
| Quinlan,2015       | retrospective       | Biotyper             | No                               | No                       | 11                    |
| Tudó,2015          | prospective         | Biotyper             | Yes                              | No                       | 12                    |
| Wilen,2015         | retrospective       | Biotyper/Vitek<br>MS | No                               | No                       | 11                    |
| Simon,2015         | retrospective       | Biotyper/Vitek<br>MS | No                               | No                       | 11                    |
| Belén,2016         | retrospective       | Biotyper             | No                               | Yes                      | 11                    |
| Ivana,2016         | retrospective       | Biotyper             | No                               | No                       | 11                    |
| Masahiro,2016      | retrospective       | Biotyper             | No                               | No                       | 12                    |
| Jan,2016           | retrospective       | Vitek MS             | No                               | Yes                      | 12                    |
| Victoria,2016      | retrospective       | Vitek MS             | Yes                              | No                       | 12                    |

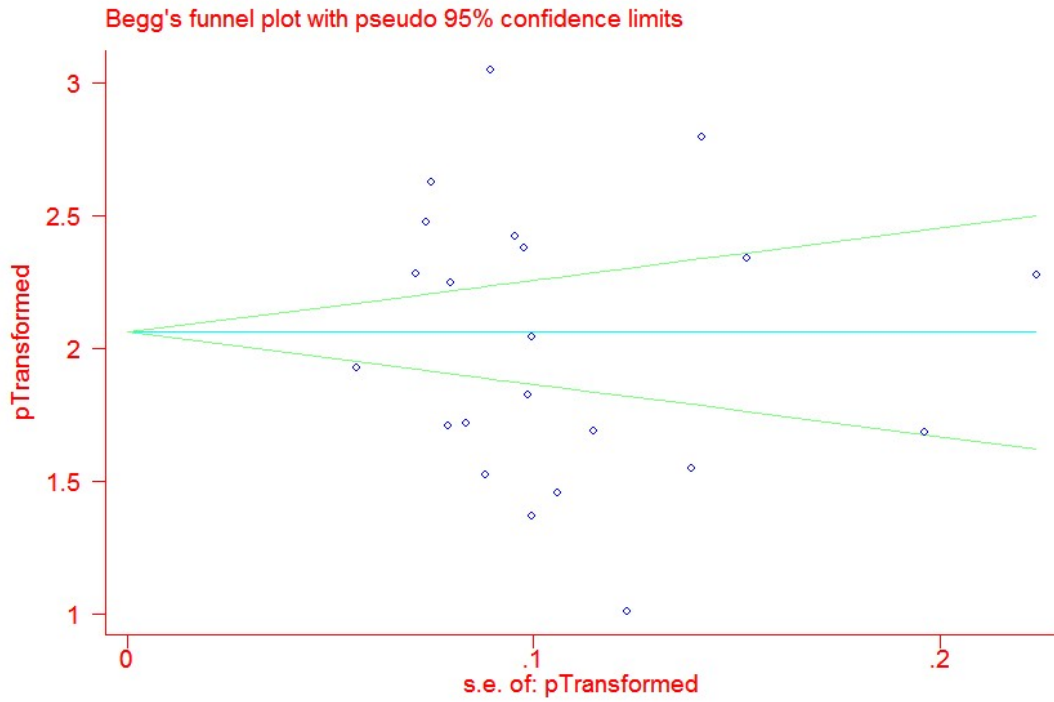

Supplementary Figure 1. Funnel plot asymmetry at the species level

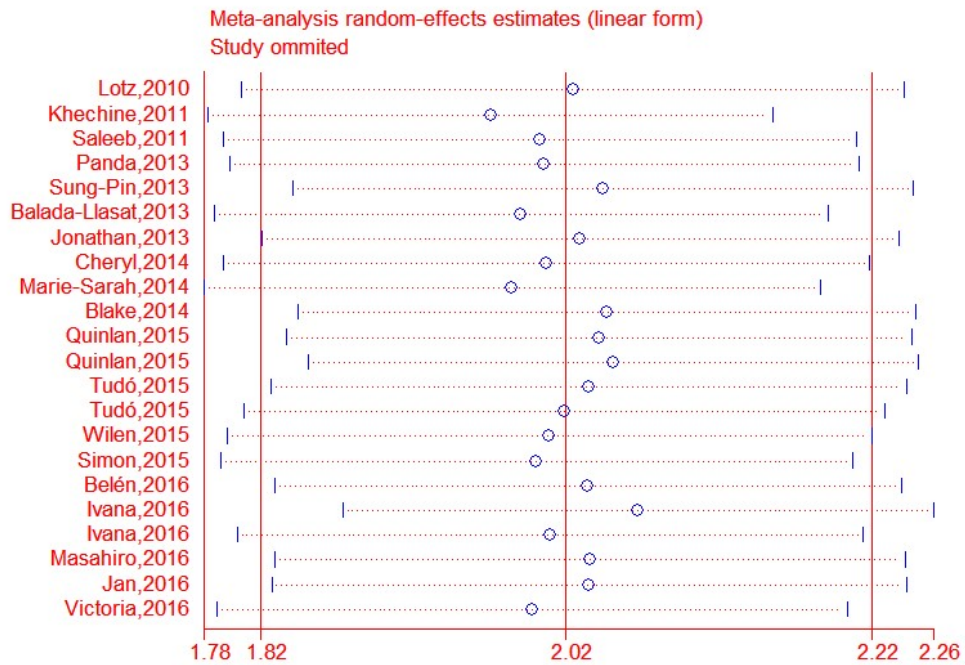

Supplementary Figure 2. Influence analysis with a random-effects model for the enrolled articles at the species level.
